# Supplementary material
Source: Springer Nature journal article supplement (https://www.springermedizin.de/resource/supplementary/12874_2011_670_MOESM2_ESM.pdf/9432374)
Supplement: MOESM2 [file 9432374]

**Meta-analyses assessed for eligibility**  
**(62510 MAs including 254306 studies)**

**Excluded from classifications: MA labelled as subgroup analysis or sensitivity analysis; or insufficient information for classification**  
**(10837 MAs including 84501 studies)**

**Numeric data excluded**

- ◆ **Studies included multiple times in one MA, repeats excluded (27434 studies)**
- ◆ **Single-study MAs (29205 MAs)**
- ◆ **Studies suspected of having erroneous data (15 MAs comprised entirely of 66 such studies, 500 additional studies)**

**Classified meta-analyses analysed**  
**(22453 MAs including 112600 studies)**

**Binary outcome MAs**  
**(14886 MAs including 77237 studies)**

**Continuous outcome MAs**  
**(6672 MAs including 29902 studies)**

**Mixed outcome MAs**  
**(895 MAs including 5461 studies)**
